# Supplementary material for: Highly stretchable hydroxyapatite bionanocomposite for high-performance triboelectric nanogenerators
Source: Royal Society of Chemistry journal article supplement (doi:10.1039/d3nr02849f), 2023-01-01
Supplement: d3nr02849f1.pdf [file d3nr02849f1.pdf]

# High-stretchable hydroxyapatite bionanocomposite for high-performance triboelectric nanogenerators

Thien Trung Luu<sup>1</sup>, Nghia Dinh Huynh<sup>1</sup>, Hakjeong Kim<sup>1</sup>, Zong-Hong Lin<sup>\*2</sup>, Dukhyun  
Choi<sup>\*1</sup>

<sup>1</sup>School of Mechanical Engineering, College of Engineering, Sungkyunkwan University, 2066,  
Seobu-ro, Jangan-gu, Suwon, Gyeonggi 16419, South Korea

<sup>2</sup>Department of Biomedical Engineering, National Taiwan University, Taipei, 10617, Taiwan

\*Corresponding author. Email address: bred96@skku.edu (D. Choi)

**Movie S1:** Vertical contact mode LED lighting (corresponds to Fig. 5c)

**Movie S2:** Portable electronic calculator charging (corresponds to Fig. 5d)

**Movie S3:** Tapping on lap to harvest electrical output (corresponds to Fig. 6a)

**Movie S4:** Tapping on cloth to harvest electrical output (corresponds to Fig. 6a)

**Movie S5:** Tapping on forearm to harvest electrical output (corresponds to Fig. 6a)

**Movie S6:** Running. HA/PDMS-TENG on sandal to light LEDs (corresponds to Fig. 6c)

**Movie S7:** Running. HA/PDMS-TENG on sandal to charge capacitor (corresponds to Fig. 6c)

**Movie S8:** Finger bending. Rubber gloves with HA/PDMS-TENG (corresponds to Fig. 6d)

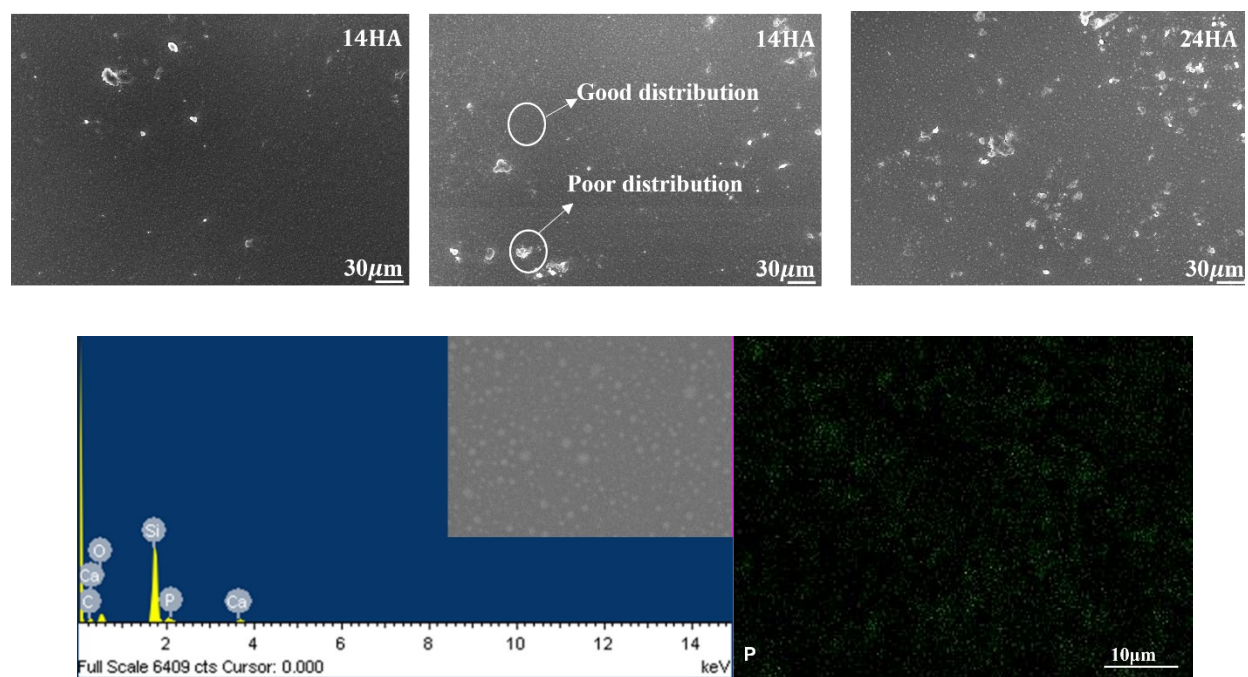

**Fig. S1.** FE-SEM, EDS, element mapping images of the HA/PDMS bionanocomposite films with different HA loadings.

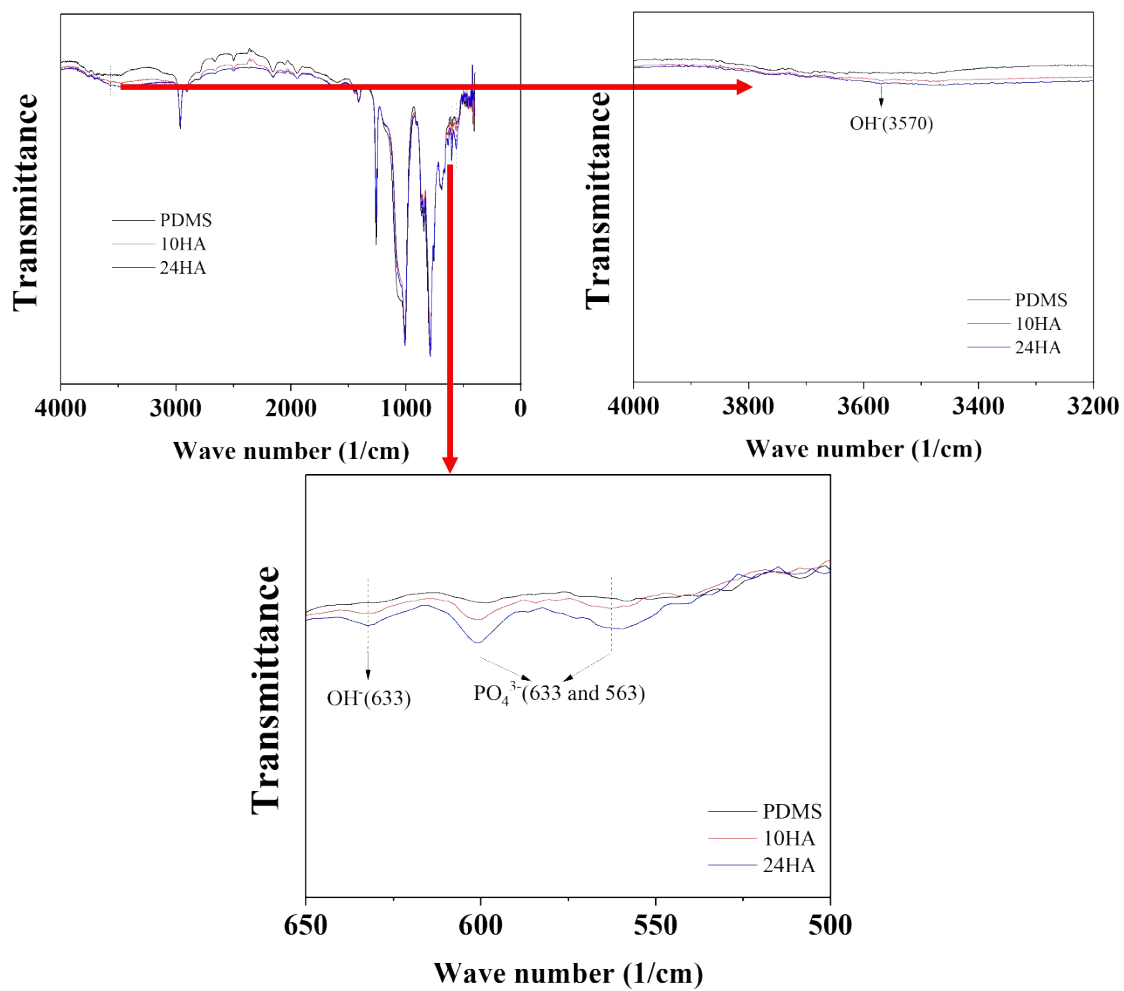

**Fig. S2.** ATR-FTIR spectra of HA/PDMS with different amounts of hydroxyapatite.

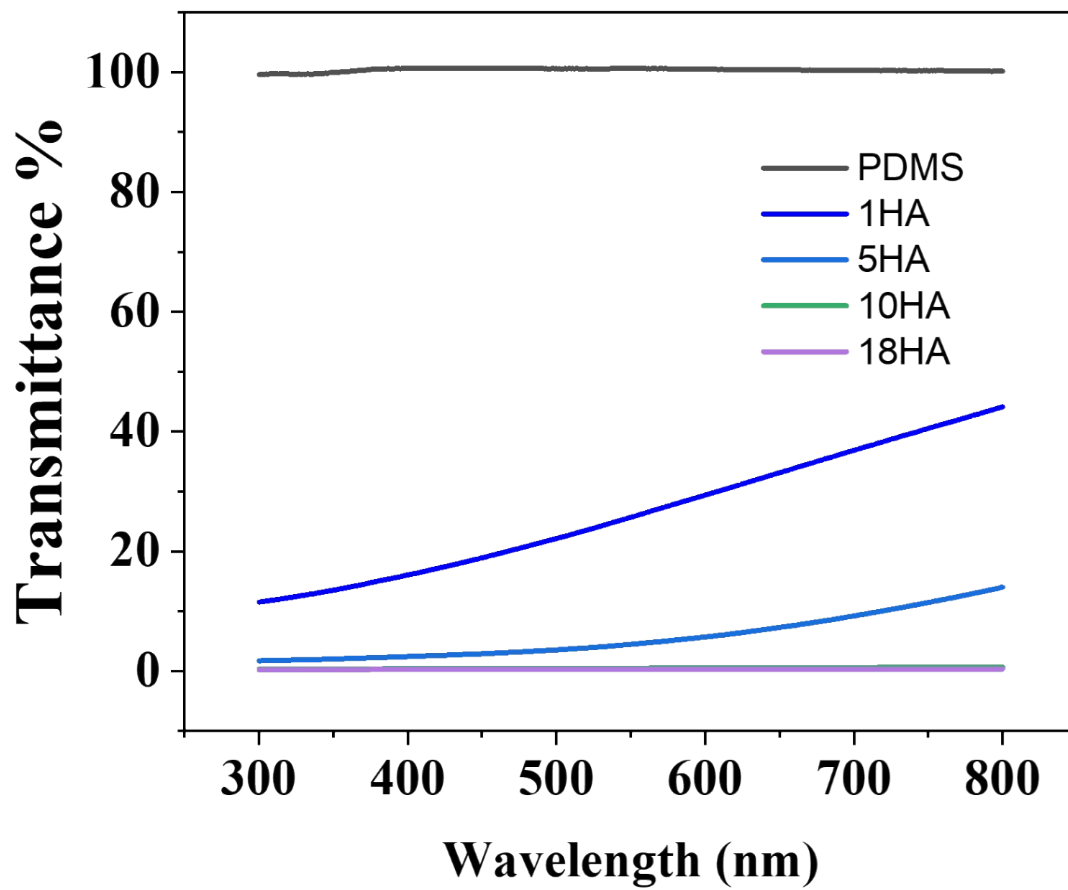

**Fig. S3.** UV-vis light transmittance spectra of HA/PDMS films with different contents of hydroxyapatite.

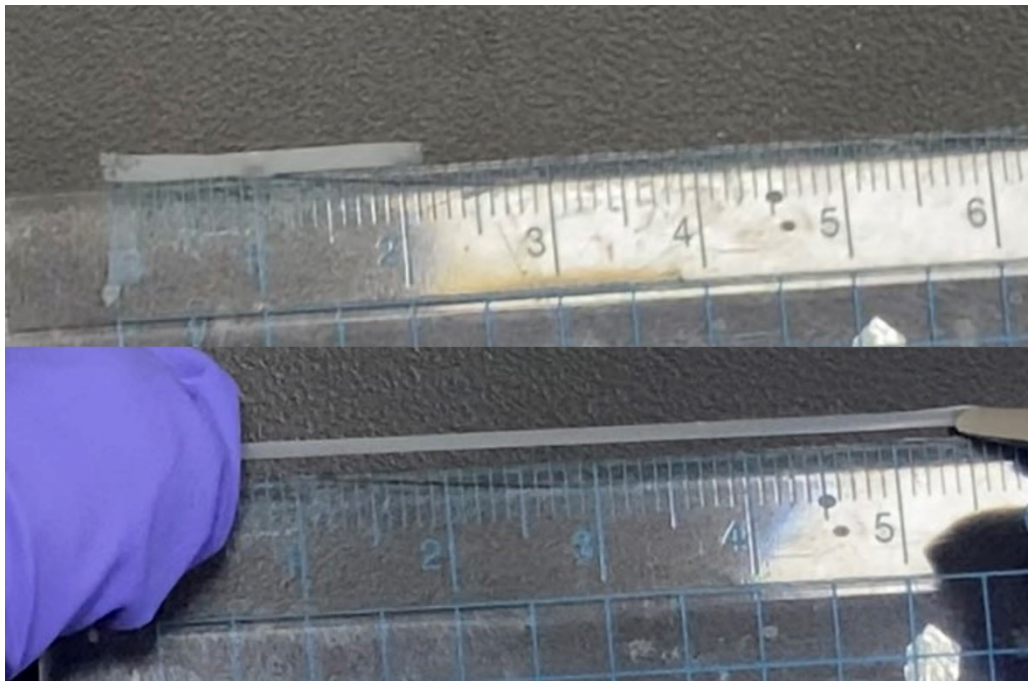

**Fig. S4.** Digital image of 10HA/PDMS before and after stretching.

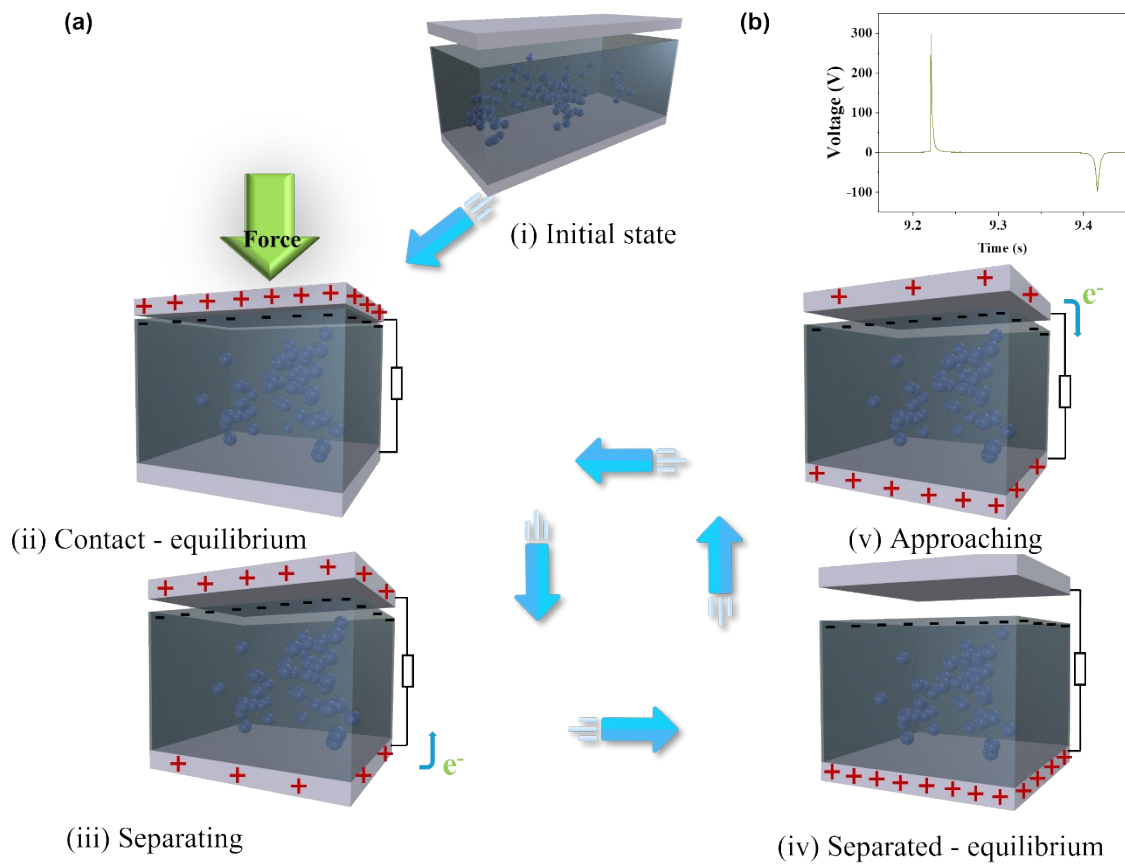

**Fig. S5.** (a) Schematic illustration of the power generation principle of the HA/PDMS-TENG. (b) Typical output voltage signal for one pressing and releasing cycle.

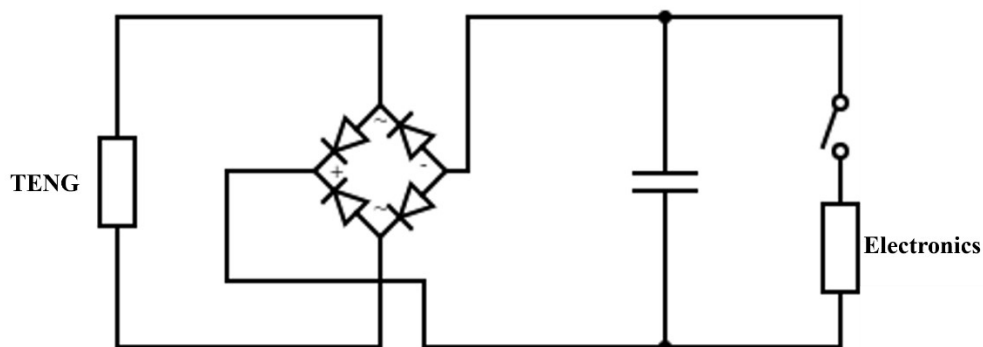

**Fig. S6.** The circuit diagram for driving a commercial calculator.

**Table S1.** HA/PDMS-TENG compared with previously reported high-dielectric constant material-based TENGs.

| TM film                              | Voltage<br>e [V] | Current<br>[ $\mu$ A] | Power density<br>[W/m <sup>2</sup> ] | Size<br>[cm <sup>2</sup> ] | Reference       |
|--------------------------------------|------------------|-----------------------|--------------------------------------|----------------------------|-----------------|
| Graphene oxide/porous PDMS           | 140.4            | 2.57                  | 3.73                                 | 0.35                       | 1               |
| ZnSnO <sub>3</sub> nanocubes /(PDMS) | 400              | 28                    | 7.5                                  | 9                          | 2               |
| PDMS/ZnSnO <sub>3</sub> /MWCNT       | 475              | 36                    | 10.5                                 | 4                          | 3               |
| PDMS/NiTe <sub>2</sub> NB            | 197              | 86.4                  | 18.9                                 | 9                          | 4               |
| SrBaTiO <sub>3</sub> /PDMS           | 280              | 8.5                   | 4.41                                 | 4                          | 5               |
| Mustard seed                         | 126              | -                     | 0.334                                | -                          | 6               |
| Silk                                 | 280              | 17.3                  | 14.4                                 | 4                          | 7               |
| <b>HA/PDMS (This work)</b>           | <b>300</b>       | <b>22.4</b>           | <b>27.34</b>                         | <b>4</b>                   | <b>Our work</b> |

## References

1. C. R. Yang, C. T. Ko, S. F. Chang and M. J. Huang, *Nano Energy*, 2022, 92.
2. G. Wang, Y. Xi, H. X. Xuan, R. C. Liu, X. Chen and L. Cheng, *Nano Energy*, 2015, 18, 28-36.
3. S. Feng, H. L. Zhang, D. L. He, Y. G. Xu, A. N. Zhang, Y. Liu and J. B. Bai, *Energy Technol-Ger*, 2019, 7.
4. Y. T. Qian, Z. Lyu, D. H. Kim and D. J. Kang, *Nano Energy*, 2021, 90.
5. M. V. Paranjape, S. A. Graham, P. Manchi, A. Kurakula and J. S. Yu, *Small*, 2023.
6. S. K. Singh, P. Kumar, R. Magdum, U. Khandelwal, S. Deswal, Y. More, S. Muduli, R. Boomishankar, S. Pandit and S. Ogale, *Acs Appl Bio Mater*, 2019, 2, 3164-3170.
7. B. Dudem, S. A. Graham, R. D. I. G. Dharmasena, S. R. P. Silva and J. S. Yu, *Nano Energy*, 2021, 83
